# Supplementary material for: Photoluminescence mechanism and applications of Zn-doped carbon dots
Source: Royal Society of Chemistry journal article supplement (doi:10.1039/c8ra02756k), 2018-01-01
Supplement: c8ra02756k1.pdf [file c8ra02756k1.pdf]

## Supporting Information

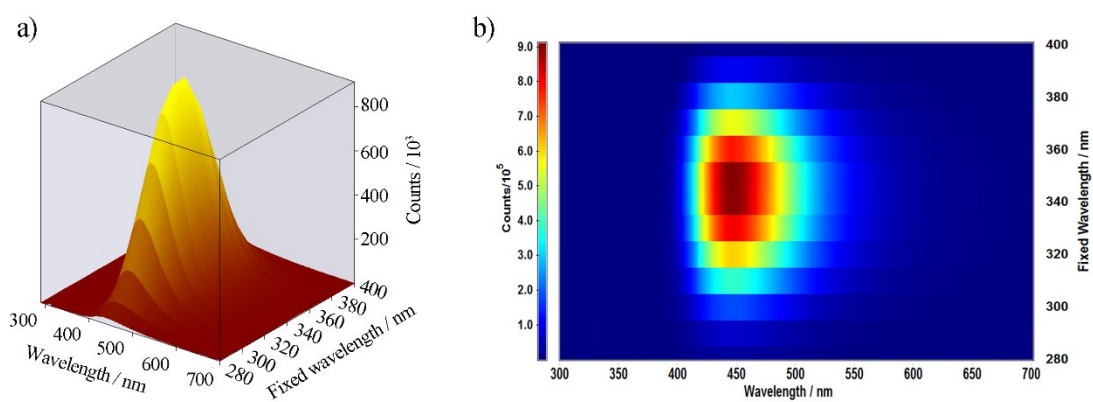

**Figure S1:** (a) 3D photoluminescence spectrum and (b) contour map of the Zn-CDs.

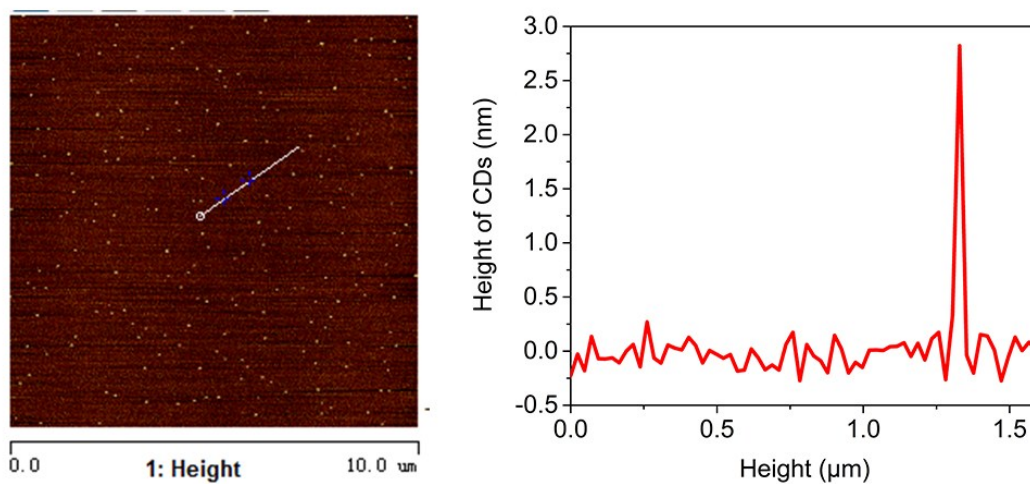

**Figure S2:** AFM of the Zn-CDs.

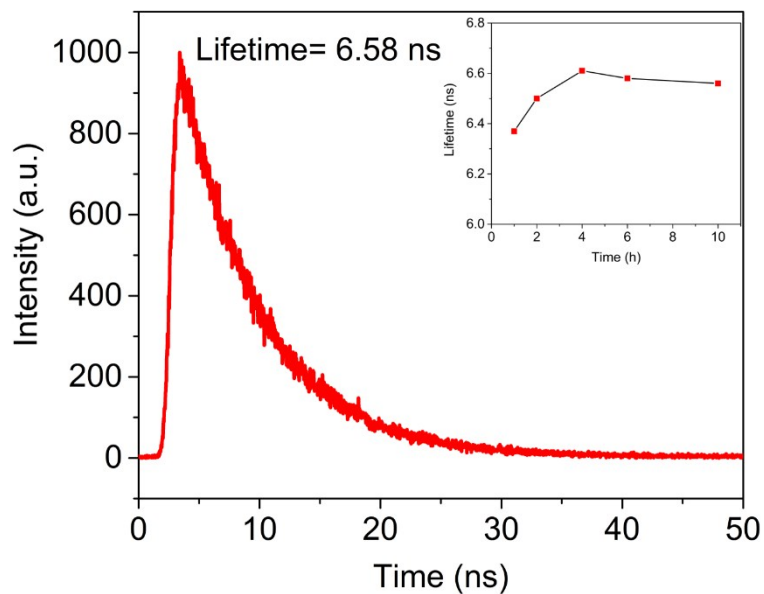

**Figure S3:** Lifetime of the Zn-CDs.

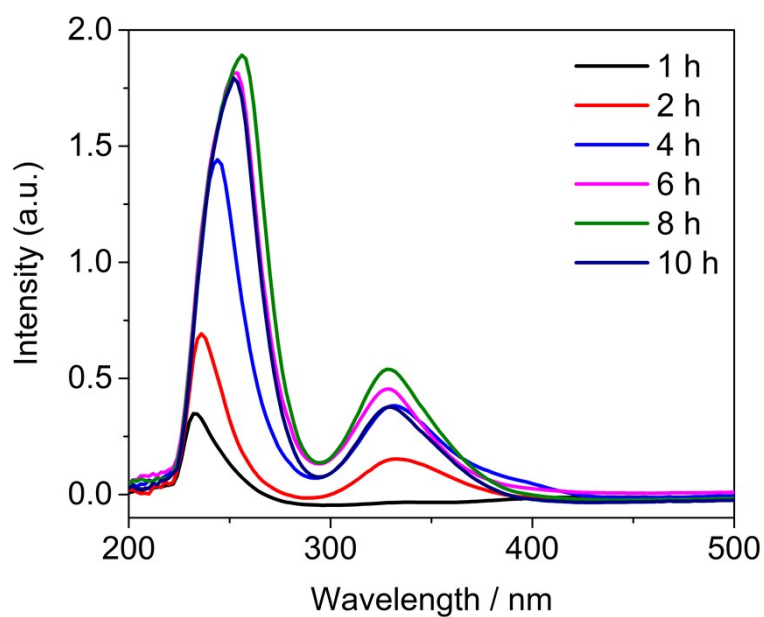

**Figure S4:** UV-Vis absorption spectra of the Zn-CDs.

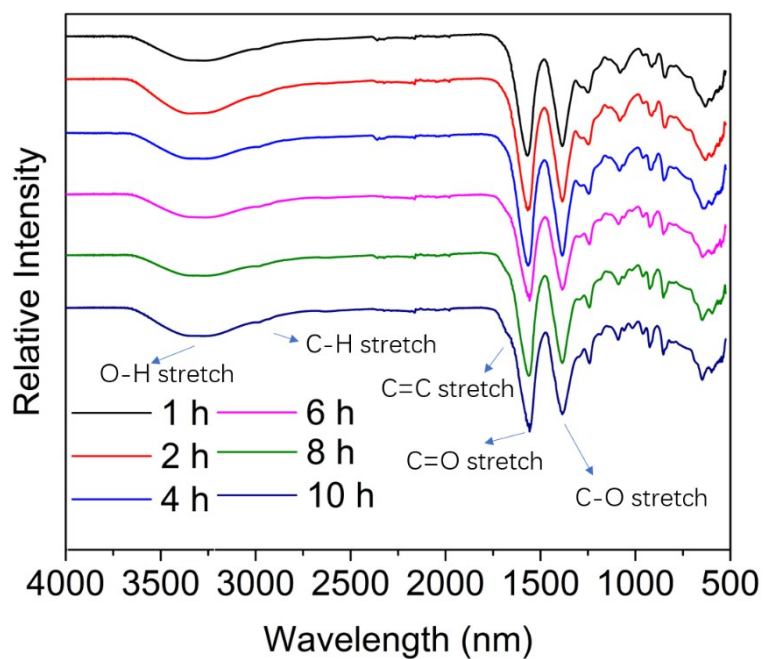

**Figure S5:** The IR spectra of the Zn-CDs.

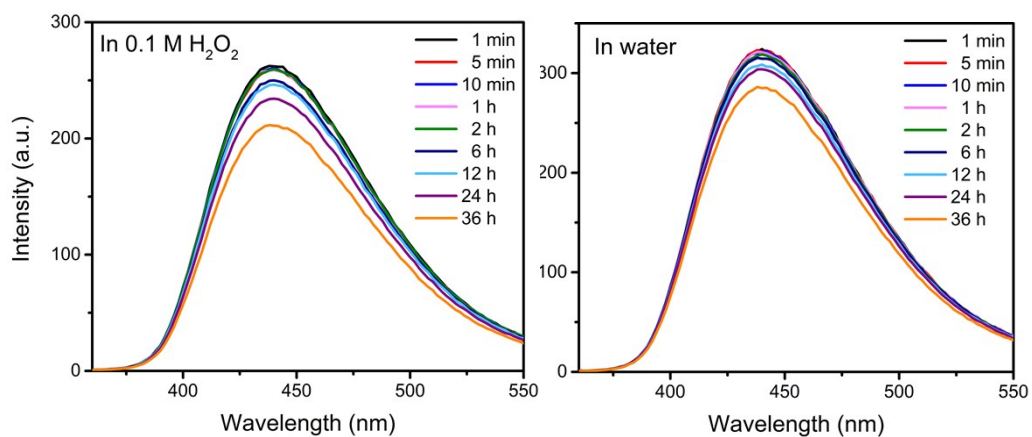

**Figure S6:** The PL spectra of Zn-CDs in 0.1 M  $H_2O_2$  and deionized water for different time (1 min to 36 h).
